# Supplementary material
Source: PubMed Central journal article supplement (PMC3113464)
Supplement: NIHMS284338-supplement-01.pdf [file NIHMS284338-supplement-01.pdf]

## DATA AND ANALYSES

### Comparison 1. Acupoint P6 stimulation versus sham

| Outcome or subgroup title                                     | No. of studies | No. of participants | Statistical method              | Effect size       |
|---------------------------------------------------------------|----------------|---------------------|---------------------------------|-------------------|
| 1 Nausea                                                      | 27             |                     | Risk Ratio (IV, Random, 95% CI) | Subtotals only    |
| 1.1 All trials                                                | 27             | 2962                | Risk Ratio (IV, Random, 95% CI) | 0.71 [0.61, 0.83] |
| 1.2 Adequate sequence generation                              | 16             | 1899                | Risk Ratio (IV, Random, 95% CI) | 0.68 [0.56, 0.84] |
| 1.3 Unclear or inadequate adequate sequence generation        | 11             | 1063                | Risk Ratio (IV, Random, 95% CI) | 0.77 [0.61, 0.97] |
| 1.4 Adequate allocation concealment                           | 4              | 529                 | Risk Ratio (IV, Random, 95% CI) | 0.75 [0.51, 1.10] |
| 1.5 Unclear or inadequate allocation concealment              | 23             | 2433                | Risk Ratio (IV, Random, 95% CI) | 0.70 [0.59, 0.84] |
| 1.6 Adequate blinding of outcome assessor                     | 23             | 2609                | Risk Ratio (IV, Random, 95% CI) | 0.69 [0.58, 0.82] |
| 1.7 Unclear or inadequate blinding of outcome assessor        | 4              | 353                 | Risk Ratio (IV, Random, 95% CI) | 0.89 [0.69, 1.14] |
| 1.8 Free of selective reporting                               | 19             | 2414                | Risk Ratio (IV, Random, 95% CI) | 0.69 [0.57, 0.84] |
| 1.9 Unclear or not free of selective reporting                | 8              | 548                 | Risk Ratio (IV, Random, 95% CI) | 0.78 [0.59, 1.02] |
| 1.10 Trials with control event rate less than or equal to 20% | 3              | 354                 | Risk Ratio (IV, Random, 95% CI) | 0.86 [0.51, 1.42] |
| 1.11 Trials with control event rate more than 20%             | 24             | 2608                | Risk Ratio (IV, Random, 95% CI) | 0.71 [0.60, 0.83] |
| 1.12 Children                                                 | 2              | 258                 | Risk Ratio (IV, Random, 95% CI) | 0.63 [0.51, 0.80] |
| 1.13 Adults                                                   | 24             | 2664                | Risk Ratio (IV, Random, 95% CI) | 0.74 [0.63, 0.88] |
| 1.14 Invasive P6 stimulation                                  | 6              | 596                 | Risk Ratio (IV, Random, 95% CI) | 0.65 [0.48, 0.89] |
| 1.15 Noninvasive P6 stimulation                               | 21             | 2366                | Risk Ratio (IV, Random, 95% CI) | 0.73 [0.61, 0.88] |
| 2 Vomiting                                                    | 32             |                     | Risk Ratio (IV, Random, 95% CI) | Subtotals only    |
| 2.1 All trials                                                | 32             | 3385                | Risk Ratio (IV, Random, 95% CI) | 0.70 [0.59, 0.83] |
| 2.2 Adequate sequence generation                              | 16             | 1892                | Risk Ratio (IV, Random, 95% CI) | 0.73 [0.58, 0.91] |
| 2.3 Unclear or inadequate adequate sequence generation        | 16             | 1493                | Risk Ratio (IV, Random, 95% CI) | 0.68 [0.53, 0.87] |
| 2.4 Adequate allocation concealment                           | 4              | 511                 | Risk Ratio (IV, Random, 95% CI) | 0.72 [0.55, 0.95] |
| 2.5 Unclear or inadequate allocation concealment              | 28             | 2874                | Risk Ratio (IV, Random, 95% CI) | 0.69 [0.57, 0.84] |
| 2.6 Adequate blinding of outcome assessor                     | 26             | 2907                | Risk Ratio (IV, Random, 95% CI) | 0.70 [0.58, 0.84] |
| 2.7 Unclear or inadequate blinding of outcome assessor        | 6              | 478                 | Risk Ratio (IV, Random, 95% CI) | 0.70 [0.49, 1.00] |
| 2.8 Free of selective reporting                               | 20             | 2525                | Risk Ratio (IV, Random, 95% CI) | 0.71 [0.57, 0.89] |

|                                                               |    |      |                                 |                   |
|---------------------------------------------------------------|----|------|---------------------------------|-------------------|
| 2.9 Unclear or not free of selective reporting                | 12 | 860  | Risk Ratio (IV, Random, 95% CI) | 0.68 [0.52, 0.89] |
| 2.10 Trials with control event rate less than or equal to 20% | 9  | 1216 | Risk Ratio (IV, Random, 95% CI) | 0.86 [0.57, 1.29] |
| 2.11 Trials with control event rate more than 20%             | 23 | 2169 | Risk Ratio (IV, Random, 95% CI) | 0.67 [0.56, 0.81] |
| 2.12 Children                                                 | 6  | 542  | Risk Ratio (IV, Random, 95% CI) | 0.67 [0.46, 0.97] |
| 2.13 Adults                                                   | 25 | 2803 | Risk Ratio (IV, Random, 95% CI) | 0.73 [0.62, 0.86] |
| 2.14 Invasive P6 stimulation                                  | 6  | 596  | Risk Ratio (IV, Random, 95% CI) | 0.60 [0.43, 0.84] |
| 2.15 Noninvasive P6 stimulation                               | 25 | 2689 | Risk Ratio (IV, Random, 95% CI) | 0.71 [0.58, 0.86] |
| 3 Rescue antiemetics                                          | 26 | 2661 | Risk Ratio (IV, Random, 95% CI) | 0.69 [0.57, 0.83] |
| 3.1 Dimenhydrinate                                            | 2  | 192  | Risk Ratio (IV, Random, 95% CI) | 0.39 [0.07, 2.16] |
| 3.2 Droperidol                                                | 1  | 64   | Risk Ratio (IV, Random, 95% CI) | 0.71 [0.22, 2.28] |
| 3.3 Metoclopramide                                            | 6  | 416  | Risk Ratio (IV, Random, 95% CI) | 0.49 [0.33, 0.73] |
| 3.4 Ondansetron                                               | 10 | 1143 | Risk Ratio (IV, Random, 95% CI) | 0.68 [0.52, 0.89] |
| 3.5 Prochlorperazine                                          | 2  | 139  | Risk Ratio (IV, Random, 95% CI) | 0.91 [0.53, 1.54] |
| 3.6 Ondansetron and droperidol                                | 2  | 341  | Risk Ratio (IV, Random, 95% CI) | 0.95 [0.67, 1.34] |
| 3.7 Ondansetron and prochlorperazine                          | 1  | 104  | Risk Ratio (IV, Random, 95% CI) | 0.33 [0.10, 1.16] |
| 3.8 Dexamethasone                                             | 1  | 50   | Risk Ratio (IV, Random, 95% CI) | 0.36 [0.15, 0.85] |
| 3.9 Dimenhydrinate and dolasetron                             | 1  | 212  | Risk Ratio (IV, Random, 95% CI) | 1.14 [0.43, 3.04] |

## Comparison 2. Acupoint P6 stimulation versus antiemetic drug

| Outcome or subgroup title                               | No. of studies | No. of participants | Statistical method              | Effect size       |
|---------------------------------------------------------|----------------|---------------------|---------------------------------|-------------------|
| 1 Nausea                                                | 9              |                     | Risk Ratio (IV, Random, 95% CI) | Subtotals only    |
| 1.1 Ondansetron                                         | 6              | 393                 | Risk Ratio (IV, Random, 95% CI) | 0.84 [0.61, 1.15] |
| 1.2 Metoclopramide                                      | 1              | 62                  | Risk Ratio (IV, Random, 95% CI) | 0.25 [0.06, 1.08] |
| 1.3 Prochlorperazine                                    | 0              | 0                   | Risk Ratio (IV, Random, 95% CI) | Not estimable     |
| 1.4 Cyclizine                                           | 1              | 62                  | Risk Ratio (IV, Random, 95% CI) | 0.5 [0.14, 1.82]  |
| 1.5 Droperidol                                          | 2              | 143                 | Risk Ratio (IV, Random, 95% CI) | 1.02 [0.47, 2.19] |
| 1.6 All antiemetics combined                            | 9              | 660                 | Risk Ratio (IV, Random, 95% CI) | 0.82 [0.60, 1.13] |
| 1.7 Adequate sequence generation                        | 6              | 451                 | Risk Ratio (IV, Random, 95% CI) | 0.92 [0.67, 1.25] |
| 1.8 Unclear or inadequate adequate sequence generation  | 3              | 209                 | Risk Ratio (IV, Random, 95% CI) | 0.36 [0.15, 0.83] |
| 1.9 Adequate allocation concealment                     | 2              | 95                  | Risk Ratio (IV, Random, 95% CI) | 0.91 [0.30, 2.74] |
| 1.10 Unclear allocation concealment                     | 7              | 565                 | Risk Ratio (IV, Random, 95% CI) | 0.78 [0.59, 1.01] |
| 1.11 Adequate blinding of outcome assessor              | 6              | 531                 | Risk Ratio (IV, Random, 95% CI) | 0.75 [0.57, 0.99] |
| 1.12 Unclear or inadequate blinding of outcome assessor | 3              | 129                 | Risk Ratio (IV, Random, 95% CI) | 1.16 [0.53, 2.54] |

|                                                         |    |      |                                 |                   |
|---------------------------------------------------------|----|------|---------------------------------|-------------------|
| 1.13 Free of selective reporting                        | 6  | 447  | Risk Ratio (IV, Random, 95% CI) | 0.80 [0.61, 1.04] |
| 1.14 Unclear or not free of selective reporting         | 3  | 213  | Risk Ratio (IV, Random, 95% CI) | 0.73 [0.22, 2.45] |
| 2 Vomiting                                              | 14 |      | Risk Ratio (IV, Random, 95% CI) | Subtotals only    |
| 2.1 Ondansetron                                         | 6  | 393  | Risk Ratio (IV, Random, 95% CI) | 1.00 [0.61, 1.66] |
| 2.2 Metoclopramide                                      | 2  | 142  | Risk Ratio (IV, Random, 95% CI) | 1.49 [0.56, 3.98] |
| 2.3 Prochlorperazine                                    | 2  | 173  | Risk Ratio (IV, Random, 95% CI) | 1.15 [0.48, 2.77] |
| 2.4 Cyclizine                                           | 1  | 62   | Risk Ratio (IV, Random, 95% CI) | 0.67 [0.21, 2.13] |
| 2.5 Droperidol                                          | 4  | 266  | Risk Ratio (IV, Random, 95% CI) | 0.96 [0.64, 1.43] |
| 2.6 All antiemetics combined                            | 14 | 1036 | Risk Ratio (IV, Random, 95% CI) | 1.01 [0.77, 1.31] |
| 2.7 Adequate sequence generation                        | 6  | 436  | Risk Ratio (IV, Random, 95% CI) | 1.00 [0.65, 1.53] |
| 2.8 Unclear or inadequate sequence generation           | 8  | 600  | Risk Ratio (IV, Random, 95% CI) | 1.01 [0.72, 1.42] |
| 2.9 Adequate allocation concealment                     | 2  | 80   | Risk Ratio (IV, Random, 95% CI) | 1.27 [0.59, 2.75] |
| 2.10 Unclear allocation concealment                     | 12 | 956  | Risk Ratio (IV, Random, 95% CI) | 0.97 [0.73, 1.30] |
| 2.11 Adequate blinding of outcome assessor              | 7  | 611  | Risk Ratio (IV, Random, 95% CI) | 0.98 [0.65, 1.47] |
| 2.12 Unclear or inadequate blinding of outcome assessor | 7  | 425  | Risk Ratio (IV, Random, 95% CI) | 1.03 [0.72, 1.46] |
| 2.13 Free of selective reporting                        | 6  | 447  | Risk Ratio (IV, Random, 95% CI) | 0.90 [0.56, 1.46] |
| 2.14 Unclear or not free of selective reporting         | 8  | 589  | Risk Ratio (IV, Random, 95% CI) | 1.06 [0.77, 1.46] |
| 3 Rescue antiemetic                                     | 7  | 527  | Risk Ratio (IV, Random, 95% CI) | 0.82 [0.59, 1.13] |
| 3.1 Ondansetron                                         | 4  | 316  | Risk Ratio (IV, Random, 95% CI) | 0.88 [0.60, 1.28] |
| 3.2 Metoclopramide                                      | 2  | 160  | Risk Ratio (IV, Random, 95% CI) | 0.69 [0.32, 1.46] |
| 3.3 Dexamethasone                                       | 1  | 51   | Risk Ratio (IV, Random, 95% CI) | 0.69 [0.25, 1.88] |
